# Supplementary material
Source: Elsevier journal article supplement (https://www.sciencedirect.com/science/article/pii/S1134009622000171)
Supplement: mmc1 [file S1134009622000171:mmc1.pdf]

# Ética de la publicación

1. ¿Su trabajo ha comportado experimentación en animales?:

**No**

2. ¿En su trabajo intervienen pacientes o sujetos humanos?:

**Sí**

- Si la respuesta es afirmativa, por favor, mencione el comité ético que aprobó la investigación.:  
**consentimiento informado de los padres del niño autorizando el uso anónimo de datos clínicos e imágenes**
- Si la respuesta es afirmativa, por favor, confirme que los autores han cumplido las normas éticas relevantes para la publicación. :

**Sí**

- Si la respuesta es afirmativa, por favor, confirme que los autores cuentan con el consentimiento informado de los pacientes. :

**Sí**

3. ¿Su trabajo incluye un ensayo clínico?:

**No**

4. ¿Todos los datos mostrados en las figuras y tablas incluidas en el manuscrito se recogen en el apartado de resultados y las conclusiones?:

**Sí**
